# Supplementary material
Source: publisher figshare collection journal article supplement (https://acs.figshare.com/ndownloader/files/5692791)
Supplement: Supplementary file 1 [file 5692791]

**Supporting Information:**

**[AsCl<sub>3</sub>([9]aneS<sub>3</sub>)]:** Addition of a CH<sub>2</sub>Cl<sub>2</sub> solution (5 cm<sup>3</sup>) of [9]aneS<sub>3</sub> (0.045 g, 0.25 mmol) to a CH<sub>2</sub>Cl<sub>2</sub> solution (5 cm<sup>3</sup>) of AsCl<sub>3</sub> (0.045 g, 0.25 mmol) produced a clear pale yellow solution. Concentration of the solution *in vacuo* produced a yellow solid which was filtered, washed with CH<sub>2</sub>Cl<sub>2</sub> and dried *in vacuo*. Yield 54%. Calculated for C<sub>6</sub>H<sub>12</sub>AsCl<sub>3</sub>S<sub>3</sub>: C, 19.9; H, 3.3%. Found: C, 20.3; H, 3.5%. <sup>1</sup>H NMR: δ 3.1 (*s*, CH<sub>2</sub>). IR/cm<sup>-1</sup>: 418 br (As-Cl).

**[AsBr<sub>3</sub>([9]aneS<sub>3</sub>)]:** Procedure as above, giving a bright yellow crystalline solid. Yield 83%. Calculated for C<sub>6</sub>H<sub>12</sub>AsBr<sub>3</sub>S<sub>3</sub>: C, 14.6; H, 2.4%. Found: C, 15.0; H, 2.5%. <sup>1</sup>H NMR: δ 3.1 (*s*, CH<sub>2</sub>). IR/cm<sup>-1</sup>: 284 br (As-Br).

**[AsI<sub>3</sub>([9]aneS<sub>3</sub>)]:** Procedure as above but using thf in place of CH<sub>2</sub>Cl<sub>2</sub>. Yellow/orange solid. Yield 62%. Calculated for C<sub>6</sub>H<sub>12</sub>AsI<sub>3</sub>S<sub>3</sub>: C, 11.3; H, 1.9%. Found: C, 11.4; H, 2.1%. <sup>1</sup>H NMR: δ 3.1 (*s*, CH<sub>2</sub>).

**[AsCl<sub>3</sub>([14]aneS<sub>4</sub>)]:** Method as above using CH<sub>2</sub>Cl<sub>2</sub>. White solid. Yield 77%. Calculated for C<sub>10</sub>H<sub>20</sub>AsCl<sub>3</sub>S<sub>4</sub>: C, 24.2; H, 4.1%. Found: C, 23.9; H, 4.3%. <sup>1</sup>H NMR: δ 1.94 (*quintet*, 4H, CH<sub>2</sub>CH<sub>2</sub>CH<sub>2</sub>), 2.67 (*t*, 8H, SCH<sub>2</sub>), 2.78 (*s*, 8H, SCH<sub>2</sub>). IR/cm<sup>-1</sup>: 409, 390 (As-Cl).

**[AsCl<sub>3</sub>([8]aneSe<sub>2</sub>)]:** Method as above, giving a deep red gum which was triturated with hexane to give a waxy red solid. Yield 45%. Calculated for C<sub>6</sub>H<sub>12</sub>AsCl<sub>3</sub>Se<sub>2</sub>: C, 17.0; H, 2.9. Found: C, 16.9; H, 3.0. <sup>1</sup>H NMR: δ 2.24 (*m*, CH<sub>2</sub>CH<sub>2</sub>CH<sub>2</sub>, 4H), 2.88 (*m*, SeCH<sub>2</sub>, 8H). IR/cm<sup>-1</sup>: 402, 392 (As-Cl).

**[AsBr<sub>3</sub>([8]aneSe<sub>2</sub>)]:** Method as above. Burgandy solid. Yield 55%. Calculated for C<sub>6</sub>H<sub>12</sub>AsBr<sub>3</sub>Se<sub>2</sub>: C, 12.9; H, 2.2%. Found: C, 12.8; H, 2.2. IR/cm<sup>-1</sup>: 297, 282 (As-Br).

**[AsI<sub>3</sub>([8]aneSe<sub>2</sub>)]:** Method as above, but using thf in place of CH<sub>2</sub>Cl<sub>2</sub>. Burgandy powder. Yield 77%. Calculated for C<sub>6</sub>H<sub>12</sub>AsI<sub>3</sub>Se<sub>2</sub>: C, 10.3; H, 1.7. Found: C, 10.0; H, 1.9%.

**[(AsCl<sub>3</sub>)<sub>2</sub>([16]aneSe<sub>4</sub>)]:** Method as above using CH<sub>2</sub>Cl<sub>2</sub>. Pale yellow solid. Yield 92%. Calculated for C<sub>12</sub>H<sub>24</sub>As<sub>2</sub>Cl<sub>6</sub>Se<sub>4</sub>: C, 17.0; H, 3.1. Found: C, 16.7; H, 3.2. <sup>1</sup>H NMR: δ 2.07

(*quin*, CH<sub>2</sub>CH<sub>2</sub>CH<sub>2</sub>, 8H), 2.70 (*t*, SeCH<sub>2</sub>, 16H). IR/cm<sup>-1</sup>: 401 br (As-Cl).

**[(AsBr<sub>3</sub>)<sub>2</sub>([16]aneSe<sub>4</sub>)]:** Method as above. Yellow solid. Yield 71%. Calculated for C<sub>12</sub>H<sub>24</sub>As<sub>2</sub>Br<sub>6</sub>Se<sub>4</sub>: C, 12.9; H, 2.2%. Found: C, 13.5; H, 2.3%. <sup>1</sup>H NMR: δ 2.07 (*quin*, CH<sub>2</sub>CH<sub>2</sub>CH<sub>2</sub>, 8H), 2.70 (*t*, SeCH<sub>2</sub>, 16H). IR/cm<sup>-1</sup>: 298, 281, 268 (As-Br).

**[(AsBr<sub>3</sub>)<sub>2</sub>([24]aneSe<sub>6</sub>)]:** Method as above. Bright yellow solid. Yield 95%. Calculated for C<sub>18</sub>H<sub>36</sub>As<sub>2</sub>Br<sub>6</sub>Se<sub>6</sub>: C, 15.9; H, 2.7%. Found: C, 15.6; H, 2.6%. <sup>1</sup>H NMR: δ 2.04 (*quin.*, 12H, CH<sub>2</sub>CH<sub>2</sub>CH<sub>2</sub>), 2.70 (*t*, SeCH<sub>2</sub>, 24H). IR/cm<sup>-1</sup>: 297, 260 (As-Br).

**[AsBr<sub>3</sub>{MeS(CH<sub>2</sub>)<sub>2</sub>SMe}]:** Method as above. Yellow solid. Yield 84%. Calculated for C<sub>4</sub>H<sub>10</sub>AsBr<sub>3</sub>S<sub>2</sub>: C, 11.0; H, 2.3%. Found: C, 10.9; H, 2.3%. <sup>1</sup>H NMR: δ 2.16 (*s*, 6H, Me), 2.74 (*s*, 4H, CH<sub>2</sub>). IR/cm<sup>-1</sup>: 298, 281, 261 (As-Br).
